# Supplementary material for: New prognostic markers revealed by RNA-Seq transcriptome analysis after MYC silencing in a metastatic gastric cancer cell line
Source: PubMed Central journal article supplement (PMC6791377; doi:10.18632/oncotarget.27208), 2019-10-08
Supplement: oncotarget-10-5768-s001.pdf [file oncotarget-10-5768-s001.pdf]

## **New prognostic markers revealed by RNA-Seq transcriptome analysis after *MYC* silencing in a metastatic gastric cancer cell line**

### **SUPPLEMENTARY MATERIALS**

**Supplementary Table 1: The top 150 DEGs downregulated for the combined dataset of *MYC* silenced versus non silenced AGP01 cells. See Supplementary Table 1**
